# Supplementary material for: In silico microdissection of microarray data from heterogeneous cell populations
Source: Springer Nature journal article supplement (doi:10.1186/1471-2105-6-54), 2005-03-14

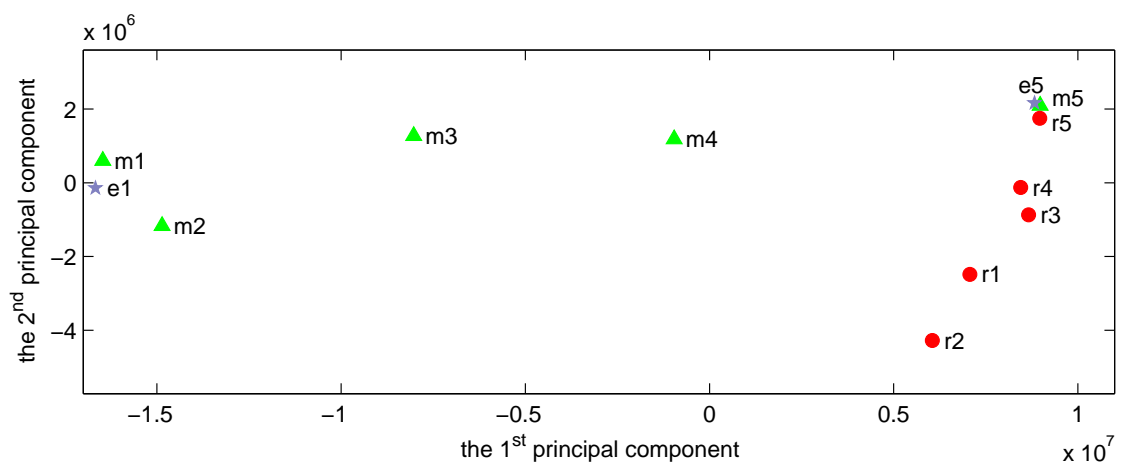

Supplement: 12859_2004_379_MOESM4_ESM.pdf [file 12859_2004_379_MOESM4_ESM.pdf]
