# Supplementary material for: In silico microdissection of microarray data from heterogeneous cell populations
Source: Springer Nature journal article supplement (doi:10.1186/1471-2105-6-54), 2005-03-14
Supplement: 12859_2004_379_MOESM7_ESM.pdf [file 12859_2004_379_MOESM7_ESM.pdf]

AC002404

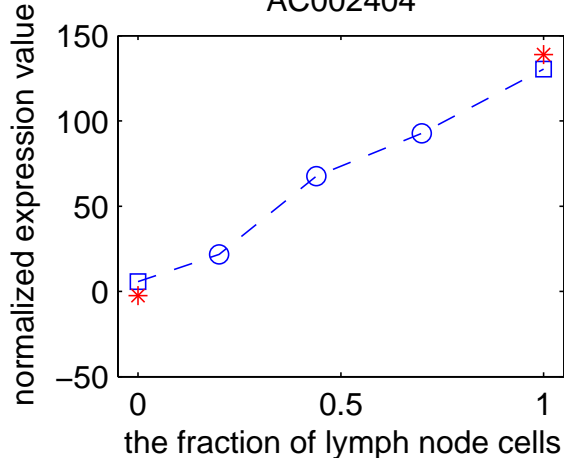

(a)

RELA

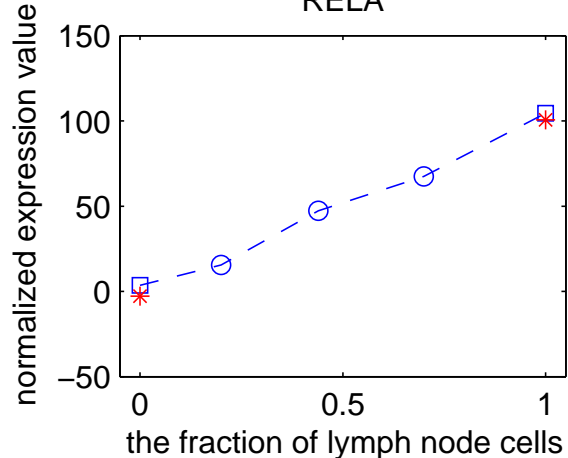

(b)

RBL1

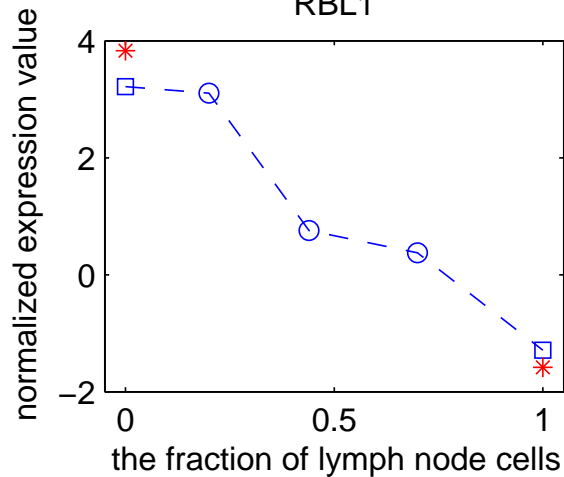

(c)

AMD1

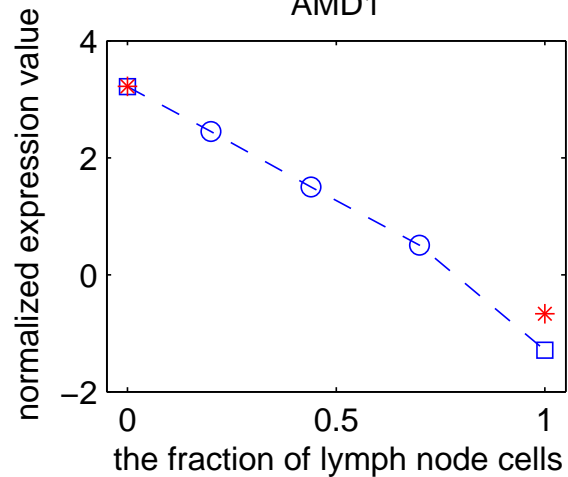

(d)
