# Supplementary material for: In silico microdissection of microarray data from heterogeneous cell populations
Source: Springer Nature journal article supplement (doi:10.1186/1471-2105-6-54), 2005-03-14
Supplement: 12859_2004_379_MOESM8_ESM.pdf [file 12859_2004_379_MOESM8_ESM.pdf]

1. Initialize  $\hat{A}^{(1)}$  and set  $j = 1$ .

2. Minimize  $\|\hat{A}^{(j)}\hat{\mathbf{x}}^{(j)} - \mathbf{y}\|$  for  $\hat{\mathbf{x}}^{(j)}$ :

$$\mathbf{x}^{(j+1)} := (\hat{A}^{(j)T} \hat{A}^{(j)})^{-1} \hat{A}^{(j)T} \mathbf{y}.$$

3. Minimize  $\|\hat{A}^{(j)}\hat{\mathbf{x}}^{(j+1)} - \mathbf{y}\|$  for  $\hat{A}^{(j)}$  (subject to constraints  $0 \leq \alpha_k \leq 1$  for all  $1 \leq k \leq K$ ). Increase the iteration index  $j := j + 1$ .

4. Repeat steps 2 and 3.
